# Supplementary material for: The Architecture of a Prototypical Bacterial Signaling Circuit Enables a Single Point Mutation to Confer Novel Network Properties
Source: PubMed Central journal article supplement (PMC3750022; doi:10.1371/journal.pgen.1003706), 2013-08-22

Figure S9

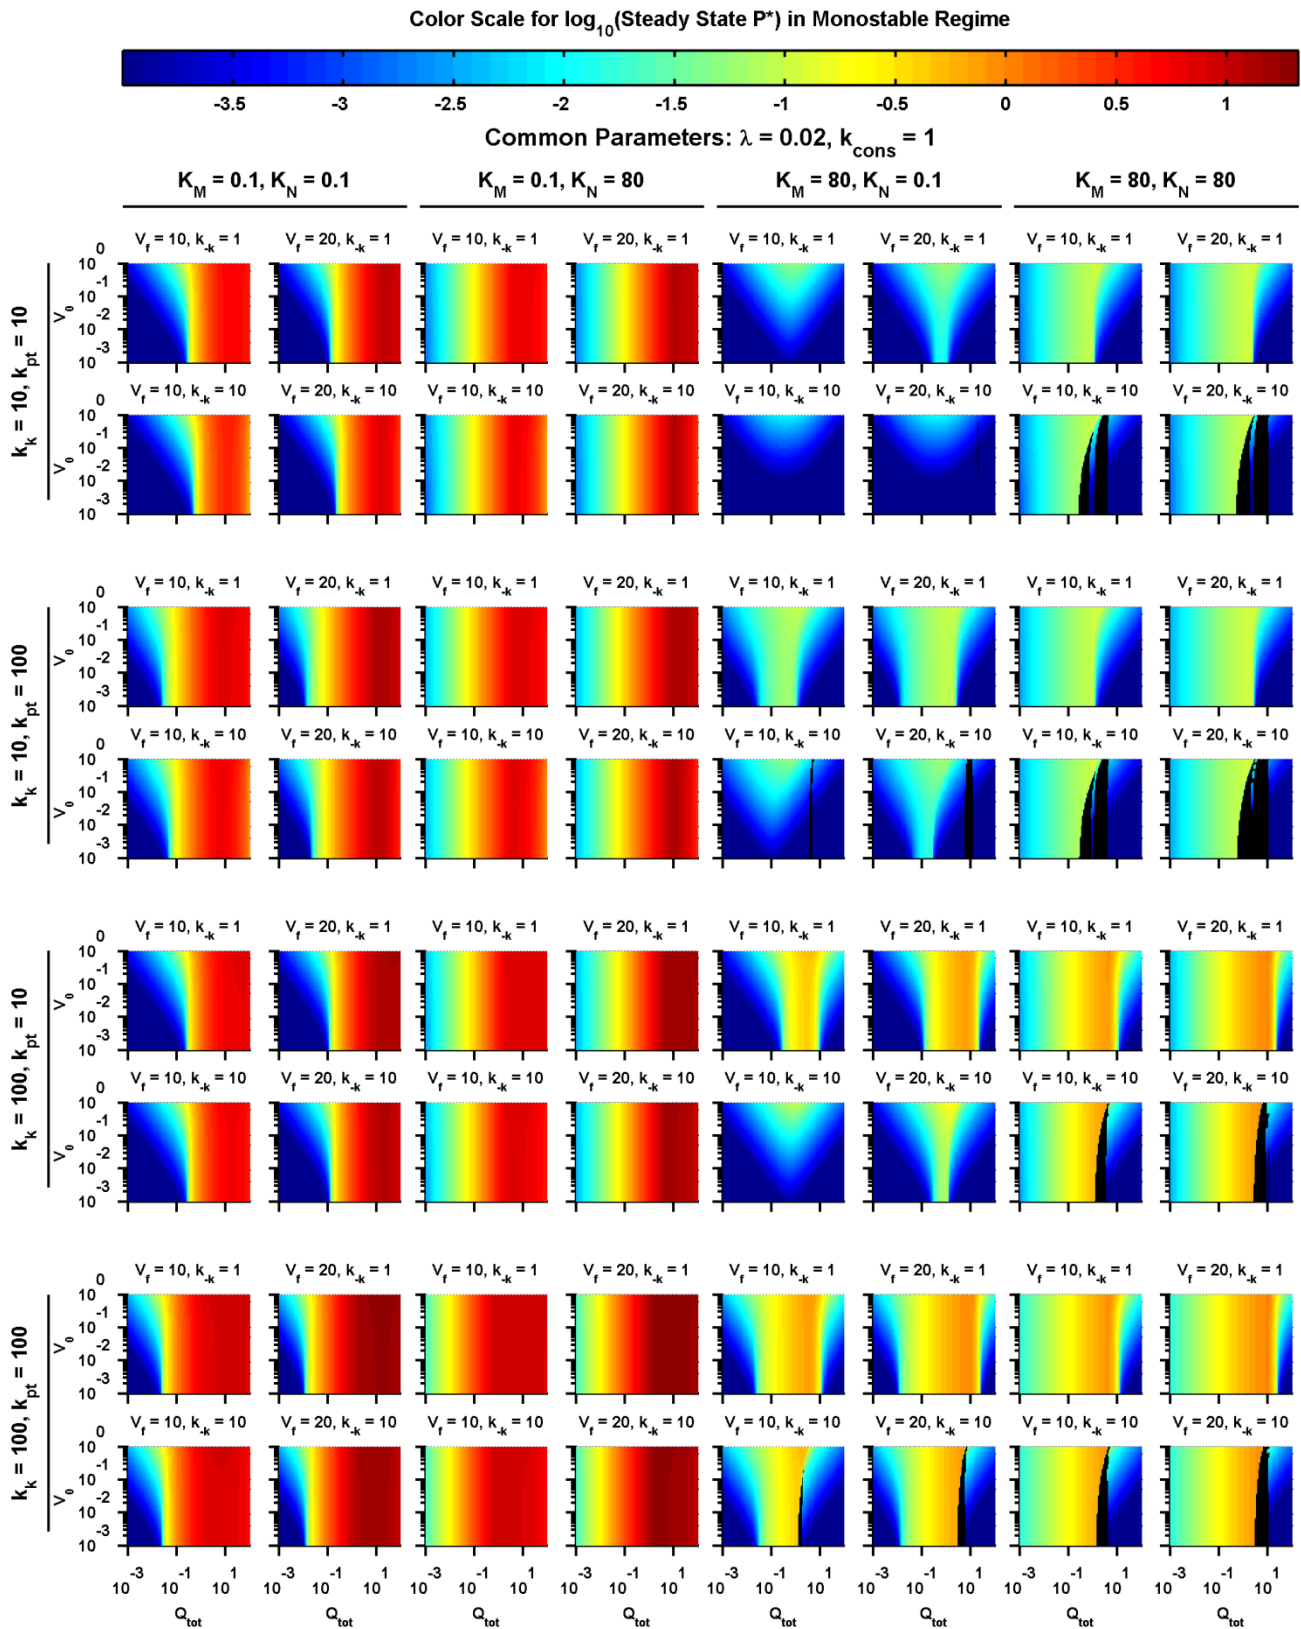

Supplement: pgen.1003706.s009.pdf [file pgen.1003706.s009.pdf]
