# Supplementary material for: The Architecture of a Prototypical Bacterial Signaling Circuit Enables a Single Point Mutation to Confer Novel Network Properties
Source: PubMed Central journal article supplement (PMC3750022; doi:10.1371/journal.pgen.1003706), 2013-08-22
Supplement: pgen.1003706.s010.pdf [file pgen.1003706.s010.pdf]

**Table S1. List of Strains**

| Strain  | Relevant Genotype                                                                                                                                                                              | Source or Reference                                |
|---------|------------------------------------------------------------------------------------------------------------------------------------------------------------------------------------------------|----------------------------------------------------|
| BW23473 | Host strain for CRIM plasmid excision                                                                                                                                                          | [1]                                                |
| JW1115  | BW25113 $\Delta(\text{phoQ})::\text{kan}$                                                                                                                                                      | [2]                                                |
| MG1655  |                                                                                                                                                                                                | <i>E. coli</i> Genetic Stock Center, CGSC no. 7740 |
| SRI027  | MG1655 $\Delta\text{phoPQ att}\phi_{80}::[\text{pTM168}]$                                                                                                                                      | This study                                         |
| SRI030  | MG1655 $\Delta\text{lacZYA } \Delta(\text{phoQ})::\text{kan att}\lambda::[\text{pTM79 } \Delta\text{cat}] att\text{HK}::[\text{pTM27 } \Delta\text{kan}]$                                      | This study                                         |
| SRI035  | MG1655 $\Delta\text{phoPQ att}\phi_{80}::[\text{pTM168 } \Delta(\text{phoP})::\text{kan}]$                                                                                                     | This study                                         |
| SRI038  | MG1655 $\Delta\text{lacZYA } \Delta\text{phoQ att}\lambda::[\text{pTM79 } \Delta\text{cat}] att\text{HK}::[\text{pTM27 } \Delta\text{kan}]$                                                    | This study                                         |
| SRI040  | MG1655 $\Delta\text{phoPQ att}\phi_{80}::[\text{pTM168 } \Delta\text{phoP}]$                                                                                                                   | This study                                         |
| SRI043  | MG1655 $att\lambda::[\text{pTM83 } \Delta(\text{cat-}P_2)::\text{kan}]^1$                                                                                                                      | This study                                         |
| SRI046  | MG1655 $\Delta\text{lacZYA } \Delta\text{phoQ att}\lambda::[\text{pTM79 } \Delta\text{cat}] att\text{HK}::[\text{pTM27 } \Delta\text{kan}] att\phi_{80}::[\text{pSR014}]$                      | This study                                         |
| SRI049  | MG1655 $\Delta\text{phoPQ } \Delta\text{lacZYA att}\lambda::[\text{pTM83 } \Delta(\text{cat-}P_2)::\text{kan}] att\text{HK}::[\text{pTM27 } \Delta\text{kan}]^1$                               | This study                                         |
| SRI054  | MG1655 $\Delta\text{phoQ}::\text{cat-}\langle\text{Iscel}\rangle^2$                                                                                                                            | This study                                         |
| SRI055  | MG1655 $\Delta\text{phoQ}::\text{cat-}\langle\text{Iscel}\rangle att\lambda::[\text{pTM79 } \Delta\text{cat}] att\text{HK}::[\text{pTM27 } \Delta\text{kan}]^2$                                | This study                                         |
| SRI056  | MG1655 $att\lambda::[\text{pTM83 } \Delta(\text{cat})::\text{kan}]$                                                                                                                            | This study                                         |
| SRI057  | MG1655 $\Delta\text{phoPQ } \Delta\text{lacZYA att}\lambda::[\text{pTM83 } \Delta(\text{cat})::\text{kan}] att\text{HK}::[\text{pTM27 } \Delta\text{kan}]$                                     | This study                                         |
| SRI058  | MG1655 $\text{phoQ (T281R) att}\lambda::[\text{pTM79 } \Delta\text{cat}] att\text{HK}::[\text{pTM27 } \Delta\text{kan}]$                                                                       | This study                                         |
| SRI059  | MG1655 $\Delta\text{phoPQ } \Delta\text{lacZYA att}\lambda::[\text{pTM83 } \Delta(\text{cat-}P_2)::\text{kan}] att\text{HK}::[\text{pTM27 } \Delta\text{kan}] att\phi_{80}::[\text{pTM168}]^1$ | This study                                         |
| SRI060  | MG1655 $\Delta\text{phoPQ } \Delta\text{lacZYA att}\lambda::[\text{pTM83 } \Delta(\text{cat})::\text{kan}] att\text{HK}::[\text{pTM27 } \Delta\text{kan}] att\phi_{80}::[\text{pTM168}]$       | This study                                         |
| SRI066  | MG1655 $\text{phoQ (T281R)}$                                                                                                                                                                   | This study                                         |
| SRI069  | MG1655 $\text{phoQ (T281R) } \Delta(P_2)::\text{kan}^1$                                                                                                                                        | This study                                         |
| SRI073  | MG1655 $\text{phoQ (T281R) } \Delta(P_2)::\text{kan att}\lambda::[\text{pTM79 } \Delta\text{cat}] att\text{HK}::[\text{pTM27 } \Delta\text{kan}]^1$                                            | This study                                         |
| SRI078  | MG1655 $\text{phoQ (T281R) att}\lambda::[\text{pTM79 } \Delta\text{cat}] att\text{HK}::[\text{pTM27 } \Delta(\text{kan})::\text{cat}]$                                                         | This study                                         |
| TIM13   | MG1655 $\Delta\text{phoPQ}$                                                                                                                                                                    | [3]                                                |
| TIM61   | MG1655 $att\text{HK}::[\text{pTM27 } \Delta(\text{kan})::\text{cat}]$                                                                                                                          | T. Miyashiro and M.G., unpublished                 |
| TIM92   | MG1655 $att\lambda::[\text{pTM79 } \Delta\text{cat}] att\text{HK}::[\text{pTM27 } \Delta\text{kan}]$                                                                                           | [4]                                                |
| TIM147  | MG1655 $att\lambda::[\text{pTM83}]$                                                                                                                                                            | T. Miyashiro and M.G., unpublished                 |
| TIM176  | MG1655 $\Delta\text{phoPQ } \Delta\text{lacZYA att}\lambda::[\text{pTM83}] att\text{HK}::[\text{pTM27 } \Delta\text{kan}]$                                                                     | [4]                                                |
| TIM210  | MG1655 $\Delta\text{lacZYA att}\lambda::[\text{pTM79 } \Delta\text{cat}] att\text{HK}::[\text{pTM27 } \Delta\text{kan}]$                                                                       | [3]                                                |

**References**

- Haldimann A, Wanner BL (2001) Conditional-replication, integration, excision, and retrieval plasmid-host systems for gene structure-function studies of bacteria. *J Bacteriol* 183: 6384-6393.
- Baba T, Ara T, Hasegawa M, Takai Y, Okumura Y, et al. (2006) Construction of Escherichia coli K-12 in-frame, single-gene knockout mutants: the Keio collection. *Mol Syst Biol* 2: 2006 0008.
- Miyashiro T, Goulian M (2008) High stimulus unmasks positive feedback in an autoregulated bacterial signaling circuit. *Proceedings of the National Academy of Sciences of the United States of America* 105: 17457-17462.
- Miyashiro T, Goulian M (2007) Stimulus-dependent differential regulation in the Escherichia coli PhoQ-PhoP system. *Proceedings of the National Academy of Sciences of the United States of America* 104: 16305-16310.

<sup>1</sup>  $P_2$  refers to the constitutive promoter of the *phoPQ* operon.

<sup>2</sup>  $\langle\text{Iscel}\rangle$  is the recognition site for the endonuclease I-SceI.
