# Supplementary material for: The Architecture of a Prototypical Bacterial Signaling Circuit Enables a Single Point Mutation to Confer Novel Network Properties
Source: PubMed Central journal article supplement (PMC3750022; doi:10.1371/journal.pgen.1003706), 2013-08-22
Supplement: pgen.1003706.s011.pdf [file pgen.1003706.s011.pdf]

**Table S2. List of Plasmids**

| Plasmid | Relevant Genotype                                                                                               | Source or Reference |
|---------|-----------------------------------------------------------------------------------------------------------------|---------------------|
| pAH123  | $\lambda$ cl857(ts) repA101(ts) oriR101 bla $\lambda$ p <sub>R</sub> -int <sub>φ80</sub>                        | [1]                 |
| pAH129  | $\lambda$ cl857(ts) repA101(ts) oriR101 bla $\lambda$ p <sub>R</sub> - (xis <sub>φ80</sub> int <sub>φ80</sub> ) | [1]                 |
| pCP20   | $\lambda$ cl857(ts) repA101(ts) oriR101 bla cat $\lambda$ p <sub>R</sub> -FLP                                   | [2]                 |
| pKD4    | oriR <sub>γR6k</sub> bla FRT::kan::FRT                                                                          | [3]                 |
| pKD13   | oriR <sub>γR6k</sub> bla FRT::kan::FRT                                                                          | [3]                 |
| pKD46   | repA101(ts) oriR101 bla P <sub>araB</sub> -(gam bet exo)                                                        | [3]                 |
| pSR014  | pTM168 ΔphoP                                                                                                    | This work           |
| pTM27   | oriR <sub>γR6k</sub> kan attP <sub>HK</sub> P <sub>tetA</sub> -cfp                                              | [4]                 |
| pTM79   | oriR <sub>γR6k</sub> cat attP <sub>λ</sub> P <sub>mgrB</sub> -yfp                                               | [4]                 |
| pTM83   | oriR <sub>γR6k</sub> cat attP <sub>λ</sub> P <sub>phoPQ</sub> -yfp                                              | [4]                 |
| pTM168  | oriR <sub>γR6k</sub> cat attP <sub>φ80</sub> lacI <sup>q</sup> P <sub>trc</sub> -(phoP-phoQ(T281R))             | [5]                 |
| pTM177  | oriR <sub>γR6k</sub> cat attP <sub>φ80</sub> lacI <sup>q</sup> P <sub>phoPQ</sub> -(phoP-phoQ(T281R))           | [5]                 |
| pWRG99  | pKD46 P <sub>tet</sub> -(I-SceI tetR)                                                                           | [6]                 |
| pWRG100 | oriR <sub>γR6k</sub> cat-<Iscel> <sup>1</sup>                                                                   | [6]                 |

**References**

1. Haldimann A, Wanner BL (2001) Conditional-replication, integration, excision, and retrieval plasmid-host systems for gene structure-function studies of bacteria. J Bacteriol 183: 6384-6393.
2. Cherepanov PP, Wackernagel W (1995) Gene disruption in Escherichia coli: TcR and KmR cassettes with the option of Flp-catalyzed excision of the antibiotic-resistance determinant. Gene 158: 9-14.
3. Datsenko KA, Wanner BL (2000) One-step inactivation of chromosomal genes in Escherichia coli K-12 using PCR products. Proc Natl Acad Sci U S A 97: 6640-6645.
4. Miyashiro T, Goulian M (2007) Stimulus-dependent differential regulation in the Escherichia coli PhoQ-PhoP system. Proceedings of the National Academy of Sciences of the United States of America 104: 16305-16310.
5. Miyashiro T, Goulian M (2008) High stimulus unmasks positive feedback in an autoregulated bacterial signaling circuit. Proceedings of the National Academy of Sciences of the United States of America 105: 17457-17462.
6. Blank K, Hensel M, Gerlach RG (2011) Rapid and highly efficient method for scarless mutagenesis within the Salmonella enterica chromosome. PLoS One 6: e15763.

<sup>1</sup> <Iscel> is the recognition site for the endonuclease I-SceI.
