# Supplementary material for: The Architecture of a Prototypical Bacterial Signaling Circuit Enables a Single Point Mutation to Confer Novel Network Properties
Source: PubMed Central journal article supplement (PMC3750022; doi:10.1371/journal.pgen.1003706), 2013-08-22
Supplement: pgen.1003706.s012.pdf [file pgen.1003706.s012.pdf]

**Table S3. List of Primers**

| <b>Primer</b> | <b>Sequence</b>                                                           |
|---------------|---------------------------------------------------------------------------|
| P1            | GTGATTACCACCGTTTCGCGGCCAGGGCTATCTGTTTTCGAATTGCGCTGATGCGCCTTACGCCCCGCCCTGC |
| P2            | TTACCCTCATATTGCTCGGTGATTTTCGCGGGCTACCGCCAGCCCTACACCCCTAGACTATATTACCCCTGTT |
| P3            | TGTACTGATGGGACGTCTGC                                                      |
| P4            | GCGTGAAGTATGGGCATATT                                                      |
| P5            | CTAACTATATTGGTCGAGCTATCACGATGGTTGATGAGCTGAAATAAACCATGAATATCCTCCTTAG       |
| P6            | CGATTATGTGGTTATGGGGTAAACATTAATAAACCAGCGGGGAGGGGAGCTGGAGCTGCTTCGAA         |
| P7            | CGGGGATCCTCTAGAACTAGTGGATCCCCCGACAGGGAGAAATAAAAAATGATCCGGGGATCCGTCGACC    |
| P8            | CGGGAAAAAAGACGCAGTAATTTTTTTCATCAGCGCAATTCGAACAGATATGTAGGCTGGAGCTGCTTCG    |
| P9            | ATGAACCTGAATCGCCAGCGGCATCAGCACCTTGTCGCCCTTGCGTATAATATGAATATCCTCCTTAG      |
| P10           | ATATCCCAATGGCATCGTAAAGAACATTTTTGAGGCATTTTCAGTCAGTTGCGCTGGAGCTGCTTCGAA     |
