# Supplementary material for: The Architecture of a Prototypical Bacterial Signaling Circuit Enables a Single Point Mutation to Confer Novel Network Properties
Source: PubMed Central journal article supplement (PMC3750022; doi:10.1371/journal.pgen.1003706), 2013-08-22
Supplement: pgen.1003706.s013.pdf [file pgen.1003706.s013.pdf]

**Table S4. Figure-wise List of Strains**

| <b>Figure</b> | <b>Strain Name</b> | <b>Strain Designation in Figure</b>                                                                                                                                    |
|---------------|--------------------|------------------------------------------------------------------------------------------------------------------------------------------------------------------------|
| <b>1</b>      | TIM92              | <i>phoQ</i> (WT)                                                                                                                                                       |
|               | SRI058             | Strain depicted in panel A. <i>phoQ</i> (T281R) in panel B. <i>phoQ</i> (T281R) OFF (YFP-dim colony) and <i>phoQ</i> (T281R) ON (YFP-bright colony) in panels C and D. |
| <b>2</b>      | SRI058             | Strain used for data presented in panels B-D                                                                                                                           |
| <b>4</b>      | SRI058             | T281R OFF Cm <sup>S</sup> (YFP-dim colony) and T281R ON Cm <sup>S</sup> (YFP-bright colony)                                                                            |
|               | SRI078             | T281R OFF Cm <sup>R</sup> (YFP-dim colony) and T281R ON Cm <sup>R</sup> (YFP-bright colony)                                                                            |
| <b>5</b>      | SRI058             | <i>phoQ</i> (T281R) OFF (YFP-dim colony) and <i>phoQ</i> (T281R) ON (YFP-bright colony)                                                                                |
| <b>6</b>      | SRI046             | Strain depicted in panel A, and used for data presented in panel B                                                                                                     |
|               | SRI058             | <i>phoQ</i> (T281R) OFF in panel D                                                                                                                                     |
|               | SRI073             | Strain depicted in panel C. $\Delta P_2$ OFF (YFP-dim colony) and $\Delta P_2$ ON (YFP-bright colony) in panel D                                                       |
| <b>S6</b>     | SRI059             | $\Delta P_2$ Reporter Strain                                                                                                                                           |
|               | SRI060             | <i>phoPQ</i> Reporter Strain                                                                                                                                           |
