# Supplementary material for: The Architecture of a Prototypical Bacterial Signaling Circuit Enables a Single Point Mutation to Confer Novel Network Properties
Source: PubMed Central journal article supplement (PMC3750022; doi:10.1371/journal.pgen.1003706), 2013-08-22
Supplement: pgen.1003706.s014.pdf [file pgen.1003706.s014.pdf]

**Table S5. Parameters and Reactions for Simulation of the Autoregulated Stochastic Model**

| <b>Molecular Species</b>  |                                 |                            |                                                                                                                                             |
|---------------------------|---------------------------------|----------------------------|---------------------------------------------------------------------------------------------------------------------------------------------|
| PQrna                     | mRNA encoding for PhoP and PhoQ |                            |                                                                                                                                             |
| P                         | PhoP protein                    |                            |                                                                                                                                             |
| Q                         | PhoQ protein                    |                            |                                                                                                                                             |
| P*                        | PhoP-P                          |                            |                                                                                                                                             |
| Q*                        | PhoQ-P protein                  |                            |                                                                                                                                             |
| PQ*                       | Complex between PhoP and PhoQ-P |                            |                                                                                                                                             |
| P*Q                       | Complex between PhoP-P and PhoQ |                            |                                                                                                                                             |
| <b>Network Reactions</b>  |                                 |                            |                                                                                                                                             |
|                           | <b>Reaction</b>                 | <b>Propensity Function</b> | <b>Parameter Values</b>                                                                                                                     |
| 1                         | P2 Promoter $\rightarrow$ PQrna | $C_{P2}$                   | $C_{P2} = 0.3 \text{ s}^{-1}$ for normal promoter<br>$C_{P2} = 0.03 \text{ s}^{-1}$ for $\Delta P_2$ promoter                               |
| 2                         | P1 Promoter $\rightarrow$ PQrna | $C_{P1}P^*/(K^*+P^*)$      | $C_{P1} = 5, 7.5, 12.5, 20 \text{ s}^{-1}$ corresponding to Parameter Sets 1-4 in Fig. S5A<br>$K^*=500$                                     |
| 3                         | PQrna $\rightarrow$ P           | $k_P \text{PQrna}$         | $k_P = 10^{-2} \text{ s}^{-1}$                                                                                                              |
| 4                         | PQrna $\rightarrow$ Q           | $k_Q \text{PQrna}$         | $k_Q = 2 \times 10^{-4} \text{ s}^{-1}$                                                                                                     |
| 5                         | $P + Q^* \rightarrow PQ^*$      | $k_5 P \times Q^*$         | $k_5 = 2 \times 10^{-3} \text{ s}^{-1}$                                                                                                     |
| 6                         | $PQ^* \rightarrow P + Q^*$      | $k_6 PQ^*$                 | $k_6 = 10 \text{ s}^{-1}$                                                                                                                   |
| 7                         | $P^* + Q \rightarrow P^*Q$      | $k_7 P^* \times Q$         | $k_7 = 2 \times 10^{-3} \text{ s}^{-1}$                                                                                                     |
| 8                         | $P^*Q \rightarrow P^* + Q$      | $k_8 P^*Q$                 | $k_8 = 10 \text{ s}^{-1}$                                                                                                                   |
| 9                         | $Q \rightarrow Q^*$             | $k_9 Q$                    | $k_9 = 5 \times 10^{-2} \text{ s}^{-1}$                                                                                                     |
| 10                        | $Q^* \rightarrow Q$             | $k_{10} Q^*$               | $k_{10} = 5 \times 10^{-3} \text{ s}^{-1}$                                                                                                  |
| 11                        | $PQ^* \rightarrow P^* + Q$      | $k_{11} PQ^*$              | $k_{11} = 5 \times 10^{-2} \text{ s}^{-1}$                                                                                                  |
| 12                        | $P \rightarrow \emptyset$       | $kP$                       | $k = \text{Growth Rate}$<br>$k = 2.5 \times 10^{-4} \text{ s}^{-1}$ for slow growth rate<br>$k = 5 \times 10^{-4} \text{ s}^{-1}$ otherwise |
| 13                        | $Q \rightarrow \emptyset$       | $kQ$                       |                                                                                                                                             |
| 14                        | $P^* \rightarrow \emptyset$     | $kP^*$                     |                                                                                                                                             |
| 15                        | $Q^* \rightarrow \emptyset$     | $kQ^*$                     |                                                                                                                                             |
| 16                        | $PQ^* \rightarrow \emptyset$    | $kPQ^*$                    |                                                                                                                                             |
| 17                        | $P^*Q \rightarrow \emptyset$    | $kP^*Q$                    |                                                                                                                                             |
| 18                        | PQrna $\rightarrow \emptyset$   | $k_{RNA} \text{PQrna}$     | $k_{RNA} = 5 \times 10^{-2} \text{ s}^{-1}$                                                                                                 |
| <b>Initial Conditions</b> |                                 |                            |                                                                                                                                             |
|                           | <b>Species</b>                  | <b>OFF state</b>           | <b>ON State</b>                                                                                                                             |
|                           | PQrna                           | 2                          | 71                                                                                                                                          |
|                           | P                               | 2                          | 1029                                                                                                                                        |
|                           | Q                               | 2                          | 6                                                                                                                                           |
|                           | P*                              | 2                          | 373                                                                                                                                         |
|                           | Q*                              | 2                          | 19                                                                                                                                          |
|                           | PQ*                             | 2                          | 4                                                                                                                                           |
|                           | P*Q                             | 2                          | 1                                                                                                                                           |
