# Supplementary material for: The Architecture of a Prototypical Bacterial Signaling Circuit Enables a Single Point Mutation to Confer Novel Network Properties
Source: PubMed Central journal article supplement (PMC3750022; doi:10.1371/journal.pgen.1003706), 2013-08-22
Supplement: pgen.1003706.s015.pdf [file pgen.1003706.s015.pdf]

**Table S6. Parameters and Reactions for Simulation of the Decoupled Stochastic Model**

| <b>Molecular Species</b> |                                 |  |  |
|--------------------------|---------------------------------|--|--|
| Prna                     | mRNA encoding for PhoP          |  |  |
| Qrna                     | mRNA encoding for PhoQ          |  |  |
| P                        | PhoP protein                    |  |  |
| Q                        | PhoQ protein                    |  |  |
| P*                       | PhoP-P                          |  |  |
| Q*                       | PhoQ-P protein                  |  |  |
| PQ*                      | Complex between PhoP and PhoQ-P |  |  |
| P*Q                      | Complex between PhoP-P and PhoQ |  |  |

  

| <b>Network Reactions</b> |                                     |                            |                                             |
|--------------------------|-------------------------------------|----------------------------|---------------------------------------------|
|                          | <b>Reaction</b>                     | <b>Propensity Function</b> | <b>Parameter Values</b>                     |
| 1                        | P2 Promoter $\rightarrow$ Prna      | $C_{P2}$                   | $C_{P2} = 0.3 \text{ s}^{-1}$               |
| 2                        | P1 Promoter $\rightarrow$ Prna      | $C_{P1}P^*/(K^*+P^*)$      | $C_{P1} = 7.5 \text{ s}^{-1}$<br>$K^*=500$  |
| 3                        | Q Promoter $\rightarrow$ Qrna       | $C_Q$                      | $C_Q$ indicated in Fig. S5D                 |
| 4                        | Prna $\rightarrow$ P                | $k_P \text{Prna}$          | $k_P = 10^{-2} \text{ s}^{-1}$              |
| 5                        | Qrna $\rightarrow$ Q                | $k_Q \text{Qrna}$          | $k_Q = 2 \times 10^{-4} \text{ s}^{-1}$     |
| 6                        | $P + Q^* \rightarrow PQ^*$          | $k_5 P \times Q^*$         | $k_5 = 2 \times 10^{-3} \text{ s}^{-1}$     |
| 7                        | $PQ^* \rightarrow P + Q^*$          | $k_6 PQ^*$                 | $k_6 = 10 \text{ s}^{-1}$                   |
| 8                        | $P^* + Q \rightarrow P^*Q$          | $k_7 P^* \times Q$         | $k_7 = 2 \times 10^{-3} \text{ s}^{-1}$     |
| 9                        | $P^*Q \rightarrow P^* + Q$          | $k_8 P^*Q$                 | $k_8 = 10 \text{ s}^{-1}$                   |
| 10                       | $Q \rightarrow Q^*$                 | $k_9 Q$                    | $k_9 = 5 \times 10^{-2} \text{ s}^{-1}$     |
| 11                       | $Q^* \rightarrow Q$                 | $k_{10} Q^*$               | $k_{10} = 5 \times 10^{-3} \text{ s}^{-1}$  |
| 12                       | $PQ^* \rightarrow P^* + Q$          | $k_{11} PQ^*$              | $k_{11} = 5 \times 10^{-2} \text{ s}^{-1}$  |
| 13                       | $P \rightarrow \emptyset$           | $kP$                       |                                             |
| 14                       | $Q \rightarrow \emptyset$           | $kQ$                       |                                             |
| 15                       | $P^* \rightarrow \emptyset$         | $kP^*$                     | $k = \text{Growth Rate}$                    |
| 16                       | $Q^* \rightarrow \emptyset$         | $kQ^*$                     | $k = 5 \times 10^{-4} \text{ s}^{-1}$       |
| 17                       | $PQ^* \rightarrow \emptyset$        | $kPQ^*$                    |                                             |
| 18                       | $P^*Q \rightarrow \emptyset$        | $kP^*Q$                    |                                             |
| 19                       | $\text{Prna} \rightarrow \emptyset$ | $k_{RNA} \text{Prna}$      | $k_{RNA} = 5 \times 10^{-2} \text{ s}^{-1}$ |
| 20                       | $\text{Qrna} \rightarrow \emptyset$ | $k_{RNA} \text{Qrna}$      | $k_{RNA} = 5 \times 10^{-2} \text{ s}^{-1}$ |

  

| <b>Initial Conditions</b> |                |                        |                      |
|---------------------------|----------------|------------------------|----------------------|
|                           | <b>Species</b> | <b>Uninduced State</b> | <b>Induced State</b> |
|                           | Prna           | 2                      | 121                  |
|                           | Qrna           | 2                      | 400                  |
|                           | P              | 2                      | 766                  |
|                           | Q              | 2                      | 29                   |
|                           | p*             | 2                      | 1623                 |
|                           | Q*             | 2                      | 107                  |
|                           | PQ*            | 2                      | 17                   |
|                           | P*Q            | 2                      | 10                   |
